# Supplementary material
Source: MDPI journal article supplement (https://www.mdpi.com/2304-6740/9/2/17)
Supplement: s1 [file s1]

# Supplementary Materials: Misinterpretations in Evaluating Interactions of Vanadium Complexes with Proteins and Other Biological Targets

João Costa Pessoa \* and Isabel Correia

Assuming that  $[BSA] = 40 \mu M$ , addition of  $[V^{IV}O(phen)_2^{2+}]$  in the concentration range 1–100  $\mu M$  and the formation of  $V^{IV}O$ -BSA species, but at this stage not considering the binding of  $V^{IV}O$ -phen complexes to BSA, the calculated species distribution diagram (Fig. SM-1),

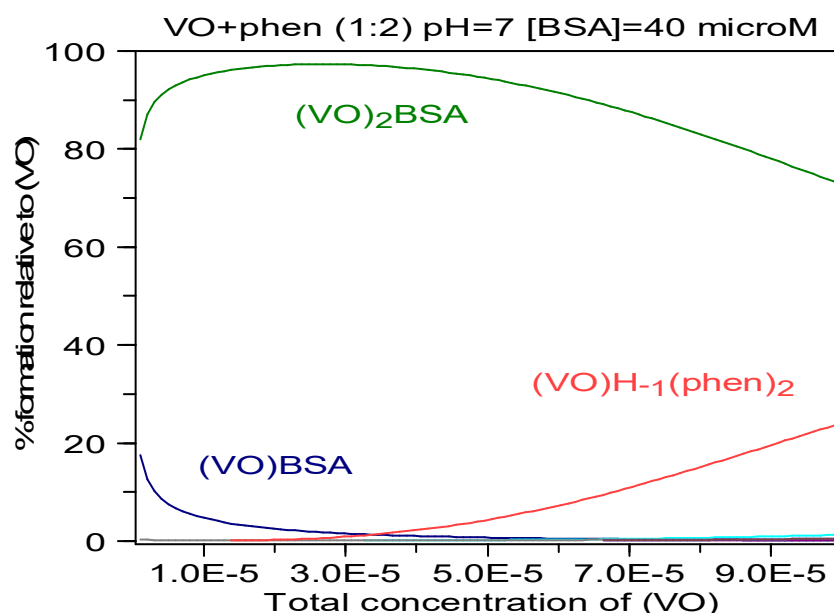

(A)

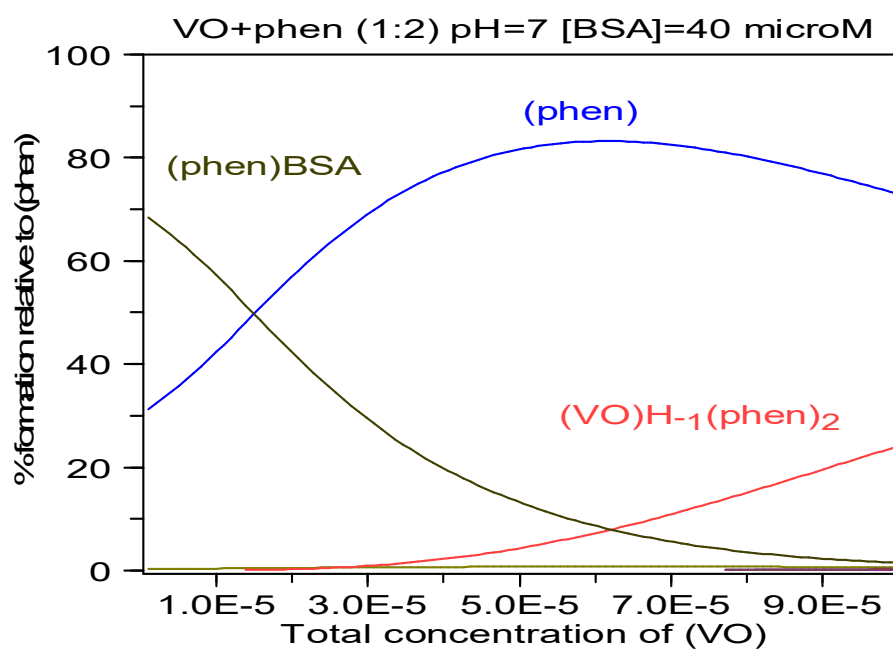

(B)

**Figure S1.** Species distribution diagrams of the system  $V^{IV}O^{2+}$ +phen+BSA at pH=7 (range of  $C_v$  values: 1 to 100  $\mu$ M) calculated using the HySS program, taking a molar ratio  $V^{IV}O$ :phen of 1:2 and [BSA] = 40  $\mu$ M. The binding of phen to BSA is taken into account with a binding constant of  $5.7 \times 10^4$ , but in this figure the formation of  $V^{IV}O$ -phen-BSA species is not considered. (A): % of formation of vanadium containing species; (B) % of formation of phen containing species.
